# Supplementary material for: Development of a potential optical thermometric material through photoluminescence of Pr3+ in La2MgTiO6
Source: Royal Society of Chemistry journal article supplement (doi:10.1039/c7tc02661g), 2017-01-01
Supplement: c7tc02661g1.pdf [file c7tc02661g1.pdf]

## Electronic Supplementary Information

### Development of Potential Optical Thermometric Material through Photoluminescence of Pr<sup>3+</sup> in La<sub>2</sub>MgTiO<sub>6</sub>

Rui Shi <sup>a</sup>, Litian Lin <sup>a</sup>, Pieter Dorenbos <sup>b</sup>, Hongbin Liang <sup>a,\*</sup>

<sup>a</sup> MOE Key Laboratory of Bioinorganic and Synthetic Chemistry, KLGHEI of Environment and Energy Chemistry, School of Chemistry, Sun Yat-sen University, Guangzhou 510275, China

<sup>b</sup> Faculty of Applied Sciences, Delft University of Technology, Mekelweg 15, 2629 JB Delft, The Netherlands

\* E-mail: cesbin@mail.sysu.edu.cn

---

\*To whom correspondence should be addressed.

## **Part A. The details of samples preparation and measurements**

### **Part B. Tables**

**Table S1** Refined unit cell parameters and refined positions of all atoms of  $\text{La}_2\text{MgTiO}_6$ .

**Table S2** Interatomic distances between La/Ti(Mg) and O atoms in  $\text{La}_2\text{MgTiO}_6$ .

### **Part C. Figures**

**Figure S1.** The FT - IR spectra of host compound and  $(\text{La}_{0.95}\text{Pr}_{0.05})_2\text{MgTiO}_6$  samples at RT.

**Figure S2.** Decay curves of  $\text{Pr}^{3+}$   $^3\text{P}_0$  and  $^1\text{D}_2$  emissions in  $(\text{La}_{0.9975}\text{Pr}_{0.0025})_2\text{MgTiO}_6$  under 490 nm excitation at RT.

**Figure S3.** Decay curves of  $\text{Pr}^{3+}$   $^3\text{P}_0$  and  $^1\text{D}_2$  emissions in  $(\text{La}_{0.9975}\text{Pr}_{0.0025})_2\text{MgTiO}_6$  under 350 nm excitation at different temperatures.

## Part A. The details of sample preparation and measurements

A series of Pr<sup>3+</sup> doped La<sub>2</sub>MgTiO<sub>6</sub> was prepared by a high temperature solid-state reaction route using raw materials La<sub>2</sub>O<sub>3</sub> (99.99%), Mg(OH)<sub>2</sub>·4MgCO<sub>3</sub>·6H<sub>2</sub>O (99%), TiO<sub>2</sub> (99.99%), and Pr<sub>6</sub>O<sub>11</sub> (99.99%). According to the nominal chemical formulas (La<sub>1-x</sub>Pr<sub>x</sub>)<sub>2</sub>MgTiO<sub>6</sub> (x = 0, 0.0025, 0.005, 0.0075, 0.01, 0.02, 0.02, 0.05), the stoichiometric amount of raw materials was ground thoroughly in an agate mortar and then heated to 1573 K in 6 h and kept at this temperature for reaction about 10 h in air atmosphere. Finally, the samples were gradually cooled down to room temperature (RT) and ground into powder.

X-ray powder diffraction using Cu K $\alpha$  radiation ( $\lambda = 0.15405$  nm) on a BRUKER D8 ADVANCE powder diffractometer was adopted to examine the phase purity of all final samples at RT. The data were collected with the scanning speed 10°·min<sup>-1</sup> and the scanning angle range 10°-70°. High quality XRD data for Rietveld refinement were collected over a scanning angle range from 5° to 105°. The medium-low temperature XRD data were recorded using an Anton Paar TTK 450 temperature controlling unit with liquid nitrogen flow cooling.

The Fourier transform infrared (FT-IR) spectra were measured by a Nicolet 6700-FTIR spectrometer with OMNIC software. The UV-vis diffuse reflectance spectra were collected through a Cary 5000 UV-vis-NIR spectrophotometer equipped with a double out-of-plane Littrow monochromator using BaSO<sub>4</sub> as a standard reference.

An Edinburgh FLS 920 combined fluorescence lifetime and steady state spectrometer was used to measure the UV excitation/emission spectra and the luminescence decay curves. A 450W Xe900 lamp was used as the excitation source for steady-state spectra, and that for luminescence decay was a 60W  $\mu$ F flash lamp with a pulse width of 1.5-3  $\mu$ s and pulse rate of 50 Hz.

## Part B. Tables

**Table S1 Refined unit cell parameters and refined positions of all atoms of  $\text{La}_2\text{MgTiO}_6$**

| Atom | x      | y      | z      | Occpancy |
|------|--------|--------|--------|----------|
| La1  | 0.9991 | 0.0215 | 1/4    | 1        |
| Ti1  | 0      | 1/2    | 0      | 0.5      |
| Mg1  | 0      | 1/2    | 0      | 0.5      |
| O1   | 0.0730 | 0.4847 | 1/4    | 1        |
| O2   | 0.7152 | 0.2866 | 0.0376 | 1        |

Symmetry: Orthorhombic; Space Group: *Pbcm* (62); Cell parameters: a = 5.5632(3) Å; b = 5.5575(3) Å; c = 7.8534(3) Å; V = 242.81(2) Å<sup>3</sup>

**Table S2 Interatomic distances between La/Ti(Mg) and O atoms in  $\text{La}_2\text{MgTiO}_6$**

| Bond   | Distance (Å) | Bond       | Distance (Å) |
|--------|--------------|------------|--------------|
| La1-O1 | 2.3889       | Ti1/Mg1-O1 | 2.0067       |
| La1-O1 | 2.6067       | Ti1/Mg1-O1 | 2.0067       |
| La1-O1 | 3.0115       | Ti1/Mg1-O2 | 2.0010       |
| La1-O1 | 3.1896       | Ti1/Mg1-O2 | 2.0010       |
| La1-O2 | 2.4308       | Ti1/Mg1-O2 | 2.0143       |
| La1-O2 | 2.4308       | Ti1/Mg1-O2 | 2.0143       |
| La1-O2 | 2.7291       |            |              |
| La1-O2 | 2.7291       |            |              |
| La1-O2 | 2.7718       |            |              |
| La1-O2 | 2.7718       |            |              |
| La1-O2 | 3.2494       |            |              |
| La1-O2 | 3.2494       |            |              |

## Part C. Figures

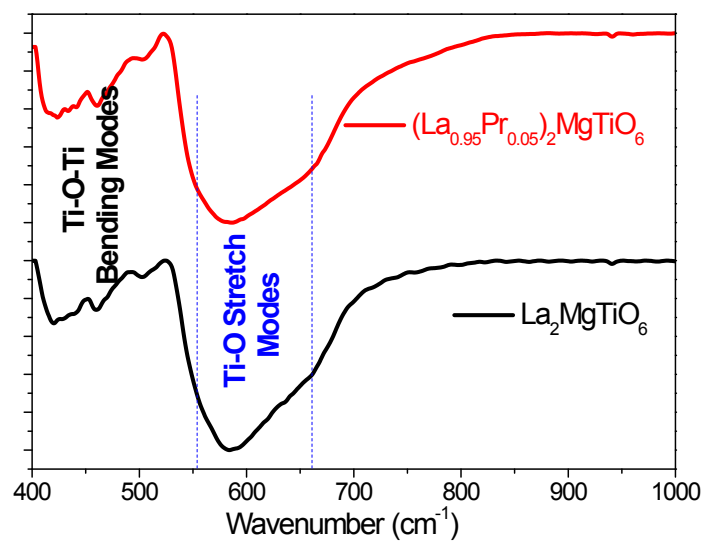

**Figure S1** The FT-IR spectra of host compound and  $(\text{La}_{0.95}\text{Pr}_{0.05})_2\text{MgTiO}_6$  samples at RT.

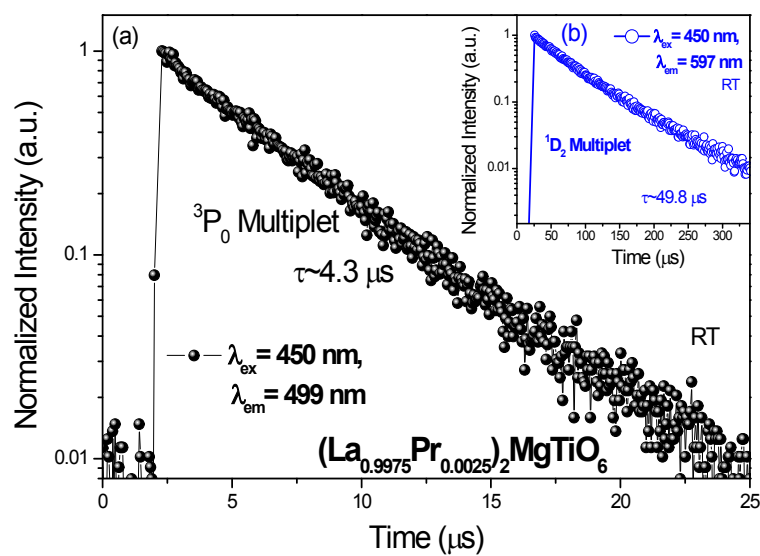

**Figure S2** Decay curves of  $\text{Pr}^{3+}$   $^3\text{P}_0$  and  $^1\text{D}_2$  emissions in  $(\text{La}_{0.9975}\text{Pr}_{0.0025})_2\text{MgTiO}_6$  under 450 nm excitation at RT.

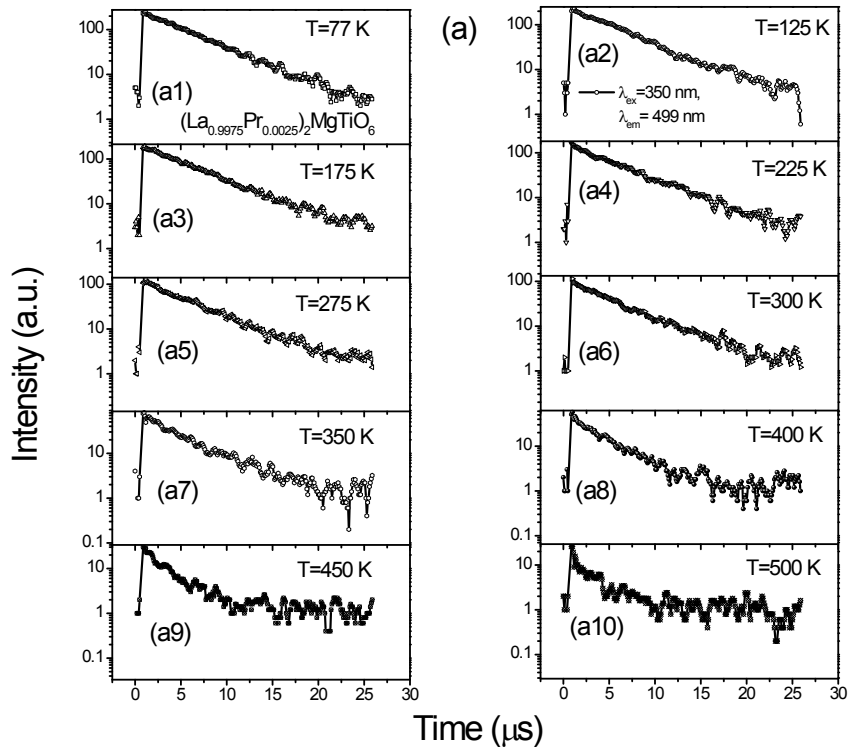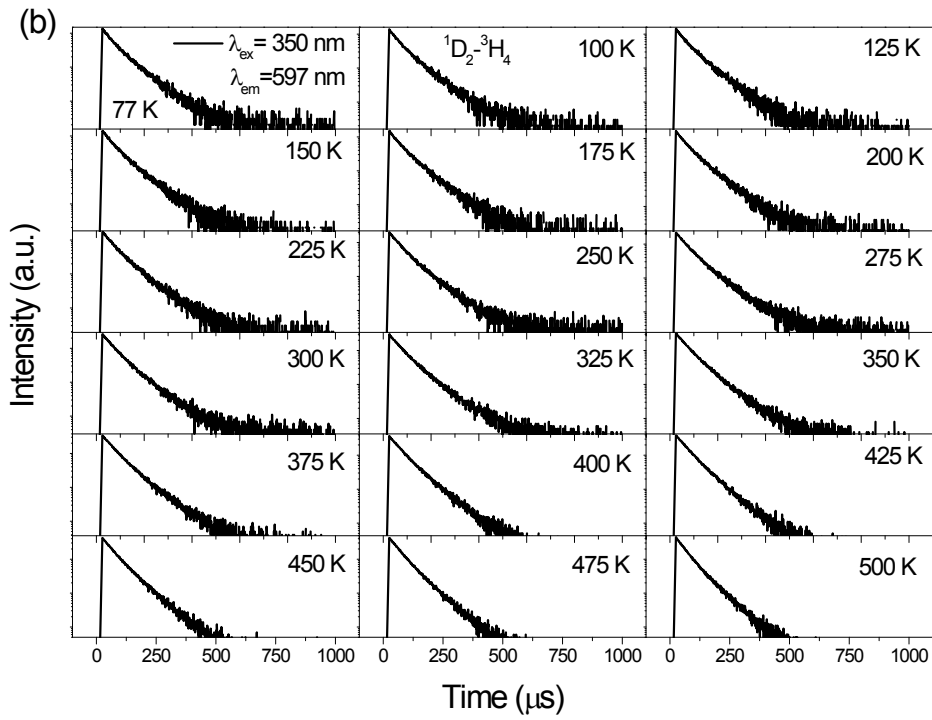

**Figure S3** Decay curves of  $\text{Pr}^{3+} \ ^3\text{P}_0$  and  $^1\text{D}_2$  emissions in  $(\text{La}_{0.9975}\text{Pr}_{0.0025})_2\text{MgTiO}_6$  under 350 nm excitation at different temperatures.
